# Supplementary material for: Investigating causality in the association between vitamin D status and self-reported tiredness
Source: PubMed Central journal article supplement (PMC6393455; doi:10.1038/s41598-019-39359-z), 2019-02-27
Supplement: 41598_2019_39359_MOESM1_ESM.pdf [file 41598_2019_39359_MOESM1_ESM.pdf]

## Supplementary Information

# Investigating causality in the association between vitamin D status and self-reported tiredness

**Alexandra Havdahl**<sup>1,2,3,4</sup>, **Ruth Mitchell**<sup>1,2</sup>, **Lavinia Paternoster**<sup>1,2</sup>, **George Davey Smith**<sup>1,2,5</sup>

<sup>1</sup> Medical Research Council Integrative Epidemiology Unit, University of Bristol, Bristol, BS8 2BN, United Kingdom

<sup>2</sup> Population Health Sciences, Bristol Medical School, University of Bristol, Bristol, BS8 2BN, United Kingdom

<sup>3</sup> Nic Waals Institute, Lovisenberg Diaconal Hospital, Oslo, 0853, Norway

<sup>4</sup> Department of Mental Disorders, Norwegian Institute of Public Health, Oslo, N-0213, Norway

<sup>5</sup> National Institute for Health Research Bristol Biomedical Research Centre, University Hospitals Bristol NHS Foundation Trust and University of Bristol

+Alphabetical order, these authors contributed equally to this work

\* alexandra.havdahl@bristol.ac.uk

**Supplementary table 1: Characteristics of SNPs associated with 25-hydroxyvitamin D used as instrumental variables.** The betas, standard errors (SE) and p values denote the association between the SNP and 25-hydroxyvitamin D. The effect allele frequency (EAF) refers to the A1 allele.

| SNP         | Chr | Position | Gene    | Beta   | SE     | A1 | A2 | EAF  | p value   |
|-------------|-----|----------|---------|--------|--------|----|----|------|-----------|
| rs3755967   | 4   | 72828262 | GC      | -0.089 | 0.0023 | T  | C  | 0.28 | 4.74E-343 |
| rs12785878  | 11  | 70845097 | DHCR7   | -0.036 | 0.0022 | G  | T  | 0.25 | 3.80E-62  |
| rs10741657  | 11  | 14871454 | CYP2R1  | -0.031 | 0.0022 | G  | A  | 0.60 | 2.05E-46  |
| rs17216707  | 20  | 52165769 | CYP24A1 | -0.026 | 0.0027 | C  | T  | 0.21 | 8.14E-23  |
| rs117913124 | 11  | 14900931 | CYP2R1  | -0.157 | 0.0065 | A  | G  | 0.03 | 2.29E-88  |
| rs10745742  | 12  | 94882660 | AMDHD1  | -0.019 | 0.002  | C  | T  | 0.61 | 2.10E-20  |
| rs8018720   | 14  | 38625936 | SEC23A  | -0.019 | 0.0027 | C  | G  | 0.82 | 1.11E-11  |

**Supplementary figure 1: Mean (+/- standard deviation) and range of 25-hydroxyvitamin D weighted genetic instrument across strata of potential confounders.** Overall mean 25-hydroxyvitamin D weighted genetic instrument for those included in the plot indicated by dashed line. 25OHD = 25-hydroxyvitamin D, p=p value for linear model.

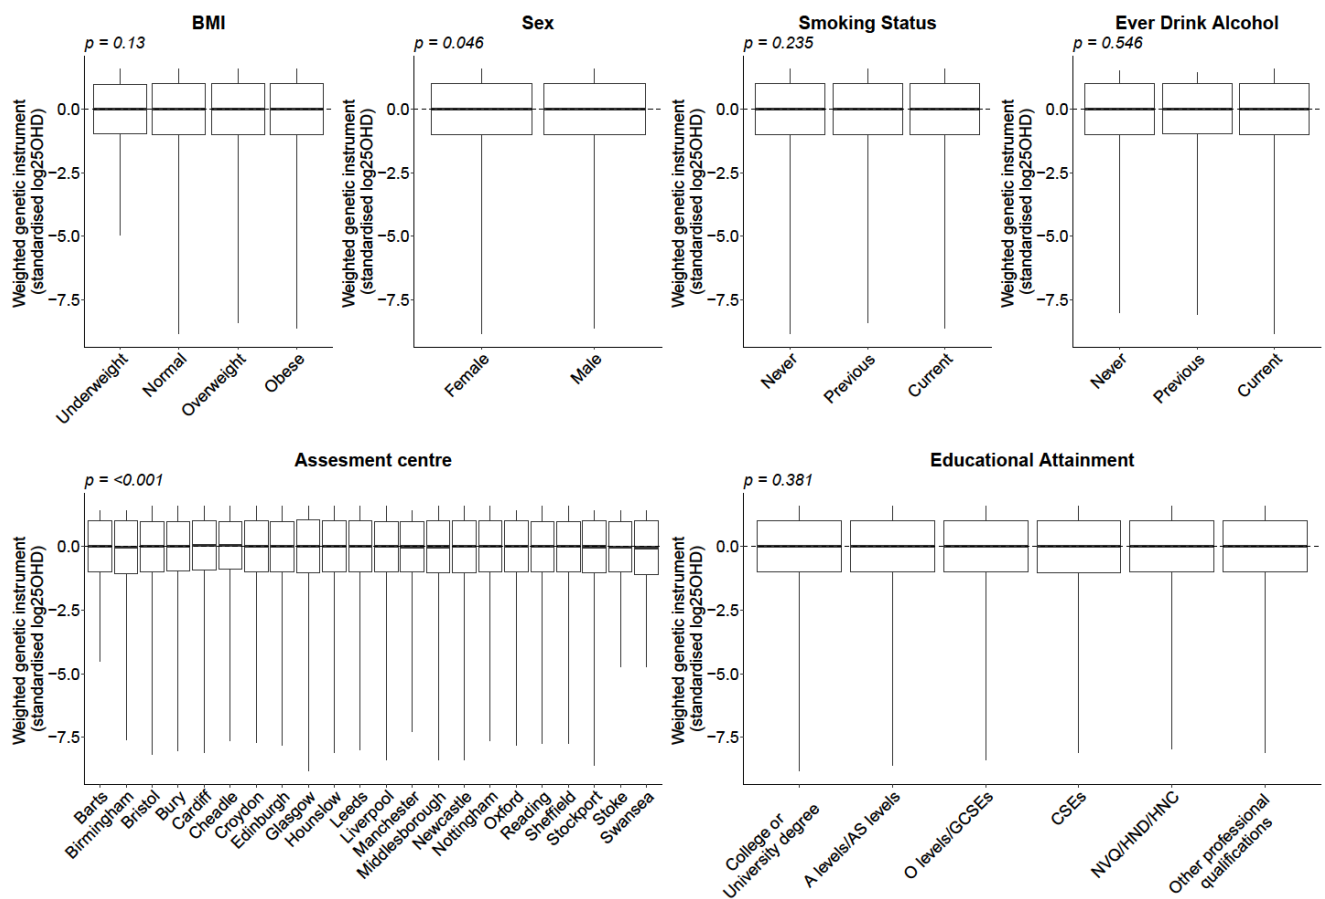

**Supplementary figure 2: Mean (+/- standard deviation) and range of 25-hydroxyvitamin D weighted genetic instrument across strata of tiredness phenotype.** Overall mean 25-hydroxyvitamin D weighted genetic instrument for those included in the plot indicated by dashed line. 25OHD = 25-hydroxyvitamin D.

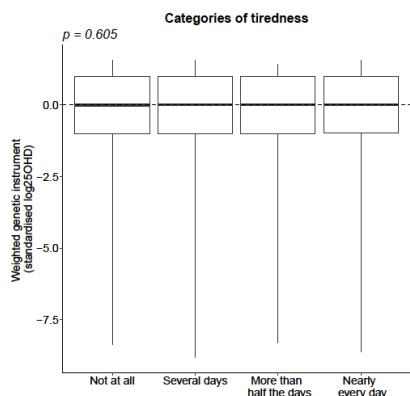

**Supplementary figure 3: Mendelian Randomization analysis of the effect of 25OHD on fatigue defined as tiredness or low energy for more than half the days over the past two weeks.** Forest plot comparing results from inverse variance weighted, weighted median and MR Egger methods. Leave-one-out sensitivity analysis of the MR analysis (using IVW) excluding that particular SNP. OR = odds ratio per 1SD log unit increase in 25OHD. 25OHD = 25-hydroxyvitamin D.

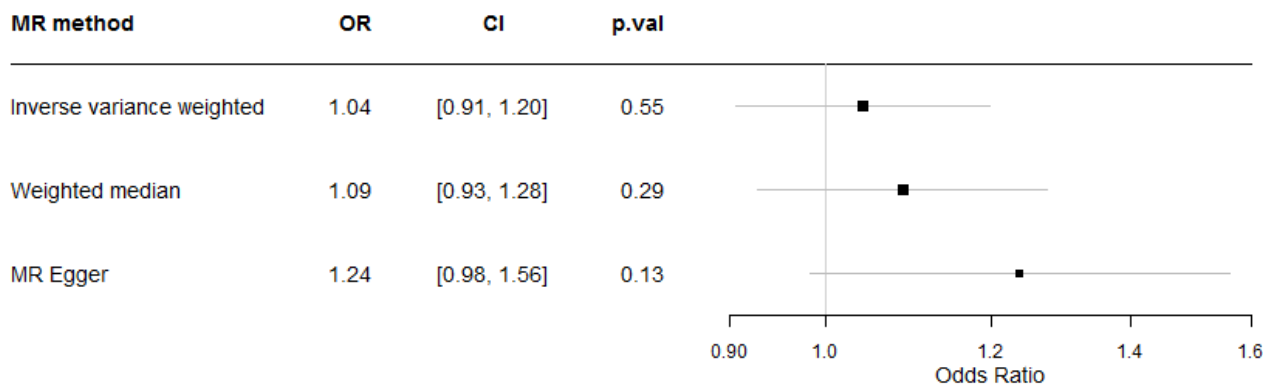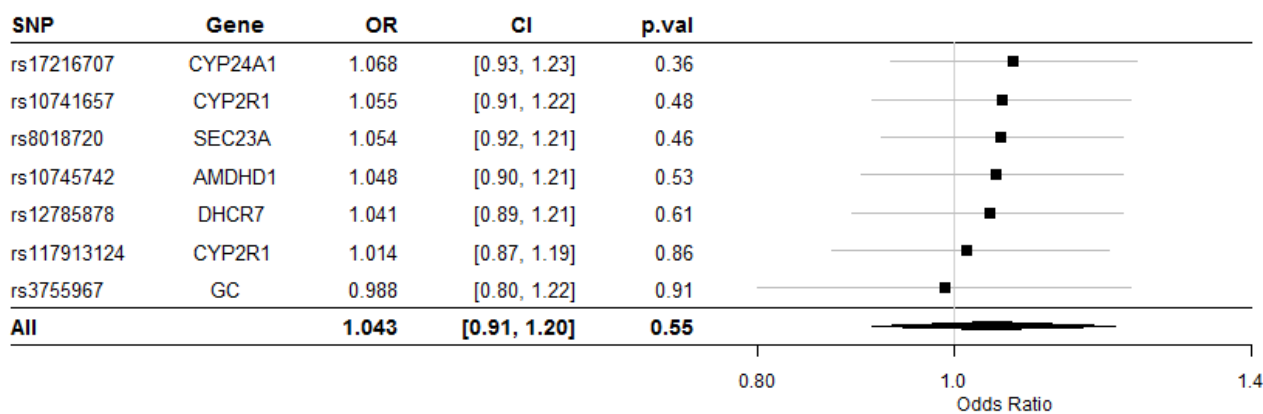

**Supplementary figure 4: Mendelian Randomization analysis of the effect of 25OHD on fatigue defined as tiredness or low energy on several days or more over the past two weeks.** Forest plot comparing results from inverse variance weighted, weighted median and MR Egger methods. Leave-one-out sensitivity analysis of the MR analysis (using IVW) excluding that particular SNP. OR = odds ratio per 1SD log unit increase in 25OHD. 25OHD = 25-hydroxyvitamin D.

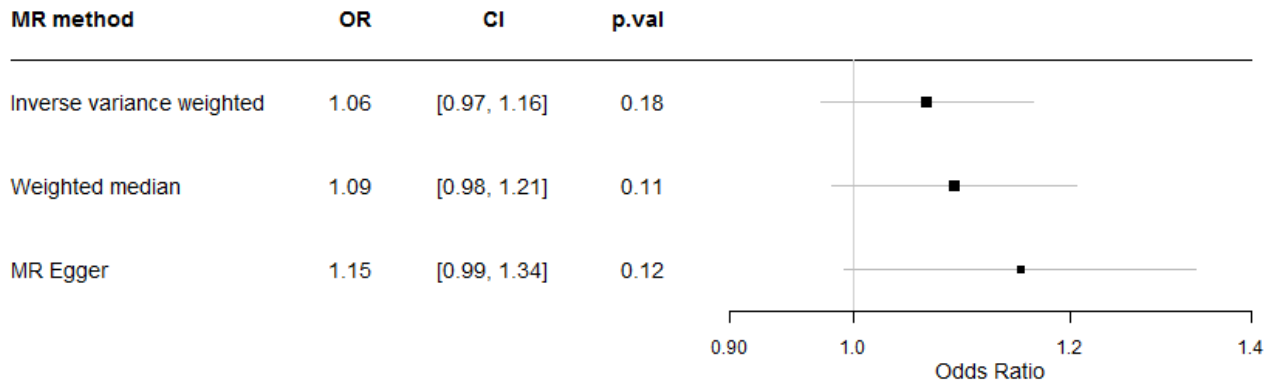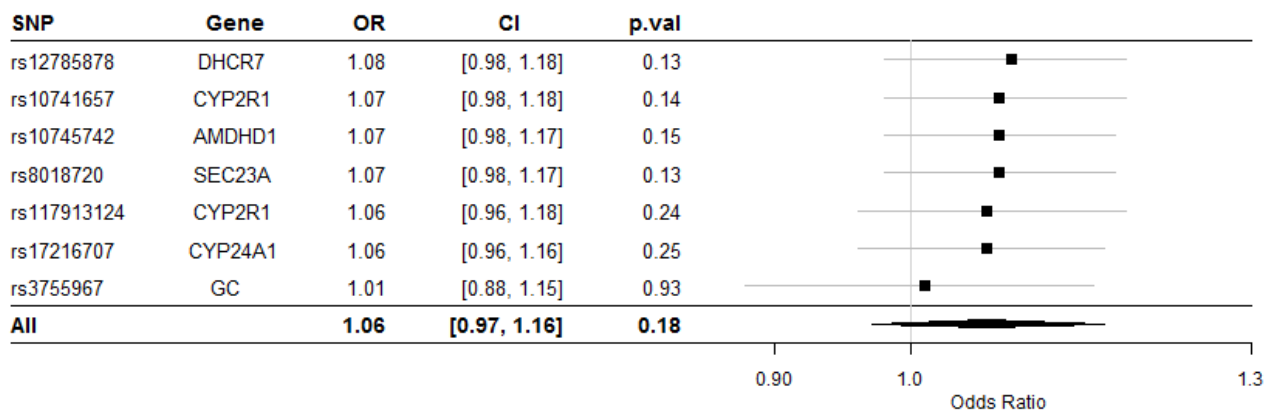

**Supplementary figure 5: Mendelian Randomization analysis of the effect of 25OHD on fatigue defined as Nearly every day compared with Not at all.** 25OHD = 25-hydroxyvitamin D. Forest plot comparing results from inverse variance weighted, weighted median and MR Egger methods. Leave-one-out sensitivity analysis of the MR analysis (using IVW) excluding that particular SNP. OR = odds ratio per 1SD log unit increase in 25OHD. 25OHD = 25-hydroxyvitamin D.

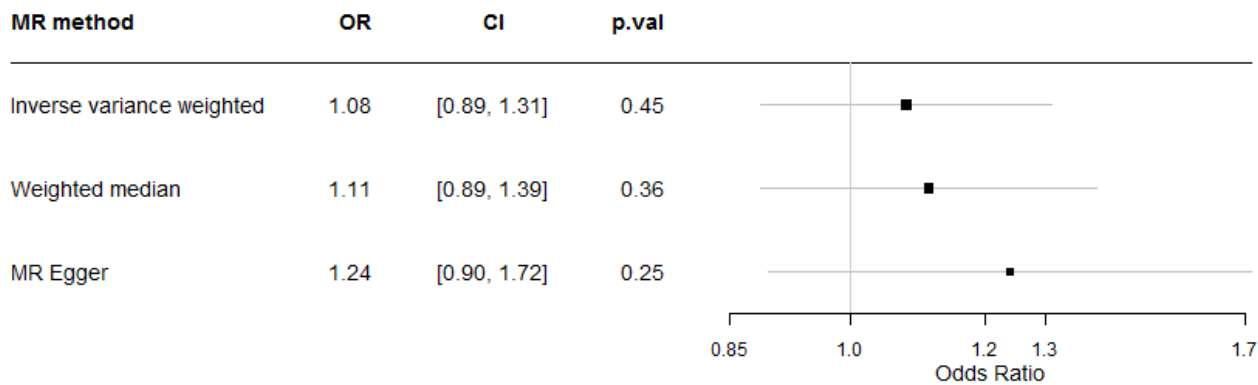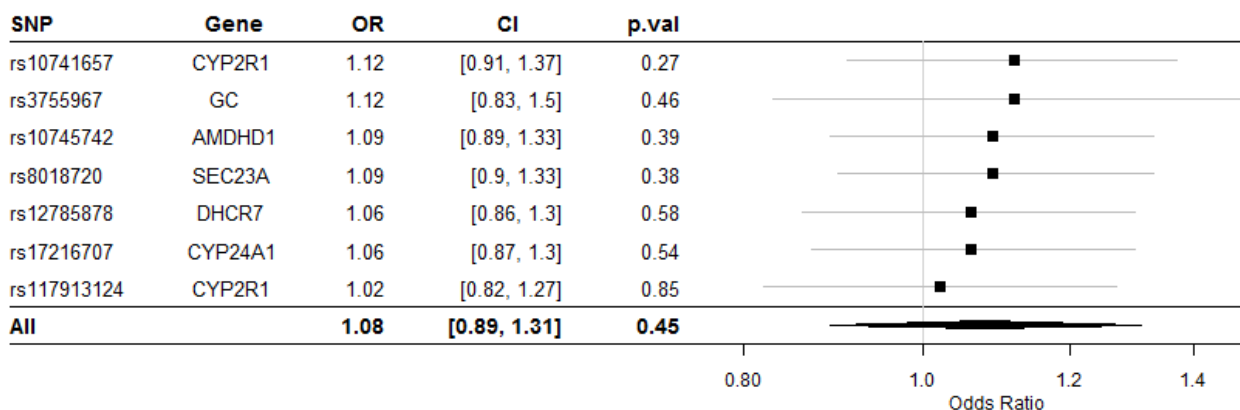

**Supplementary figure 6: Mendelian Randomization analysis of the effect of 25OHD on fatigue as a continuous variable.** 25OHD = 25-hydroxyvitamin D. Forest plot comparing results from inverse variance weighted, weighted median and MR Egger methods. Leave-one-out sensitivity analysis of the MR analysis (using IVW) excluding that particular SNP. Beta = Increase fatigue category per 1SD log unit increase in 25OHD. 25OHD = 25-hydroxyvitamin D.

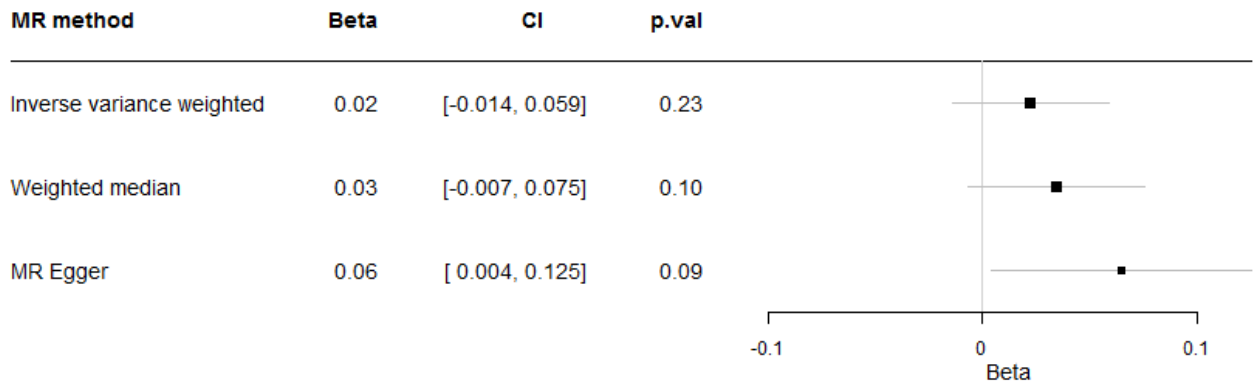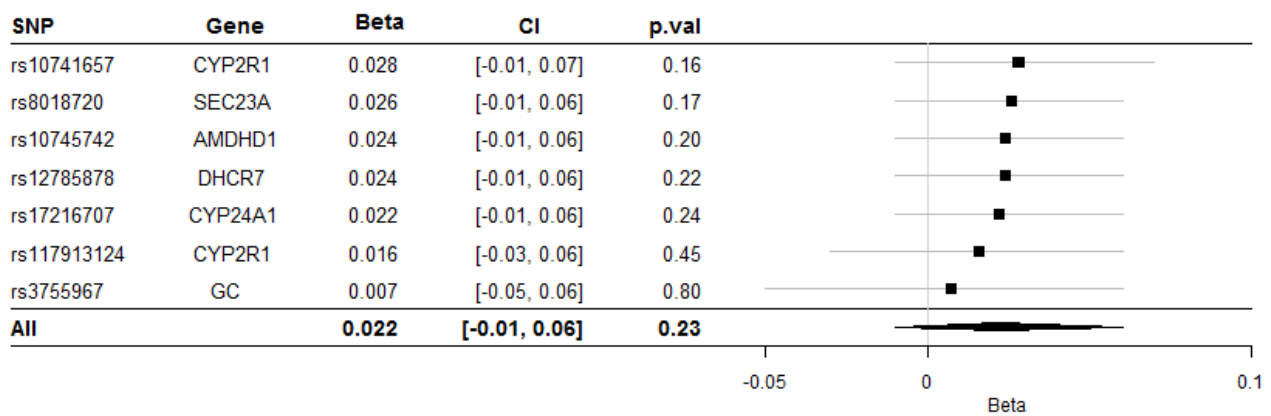

**Supplementary figure 7: Mendelian Randomization analysis of the effect of tiredness on 25-hydroxyvitamin D.** Forest plot comparing results from inverse variance weighted, weighted median and MR Egger methods. Leave-one-out sensitivity analysis of the MR analysis (using IVW) excluding that particular SNP. Beta= log-25OHD per 1 unit increase in fatigue. 25OHD = 25-hydroxyvitamin D.

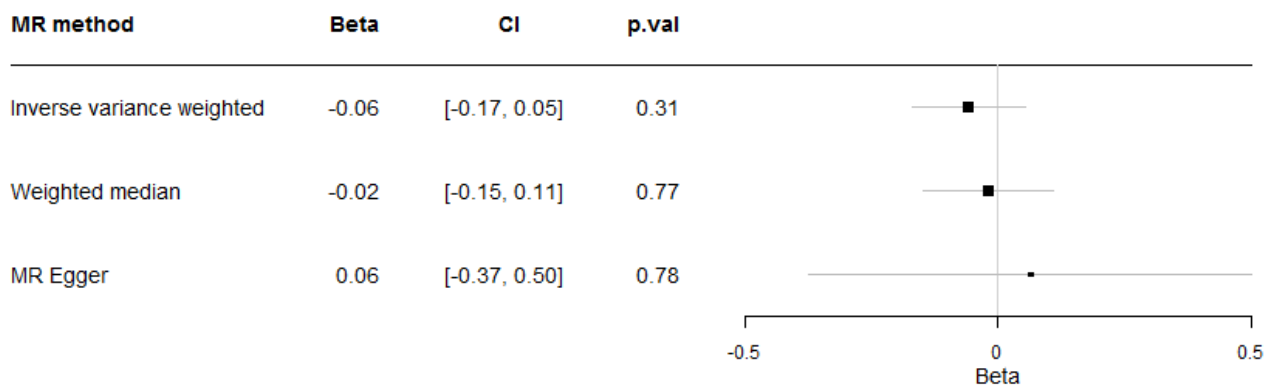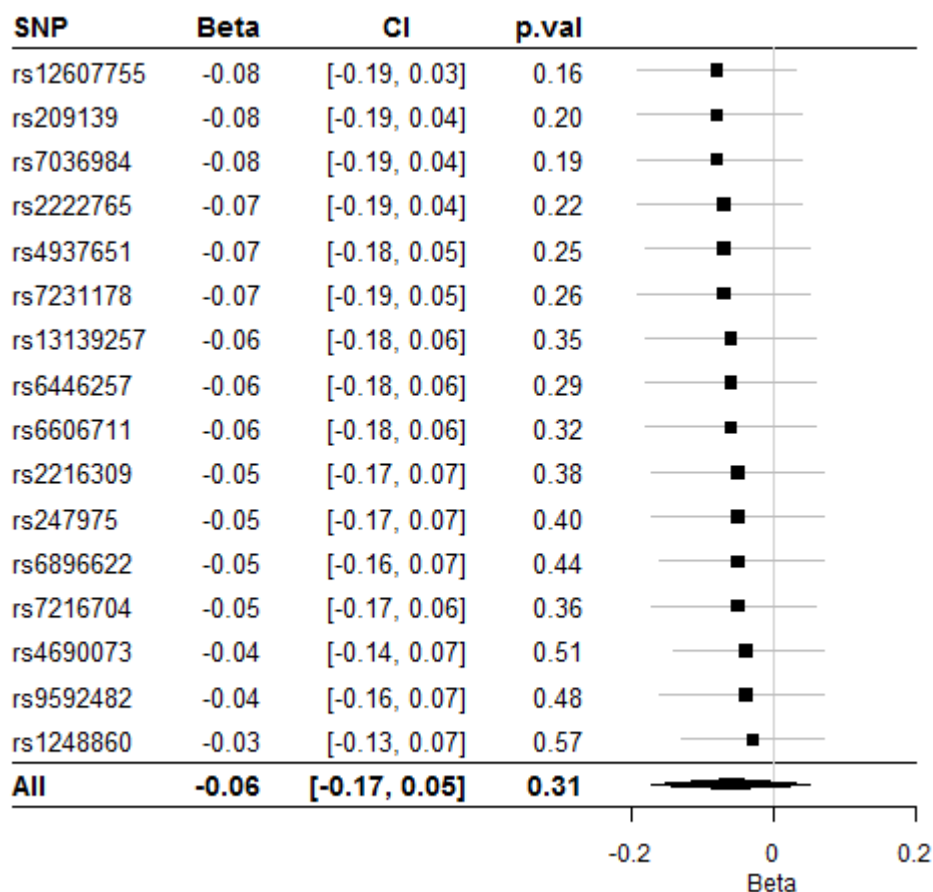

**Supplementary table 2: Proportion (%) of individuals with a disorder associated with fatigue across categories of tiredness.** Individuals with disorders were extracted from the ICD-10 or the self report codes.

|                            | Not at all | Several days | More than half the days | Nearly every day |
|----------------------------|------------|--------------|-------------------------|------------------|
| Multiple Sclerosis         | 22.3       | 43.4         | 10.6                    | 23.6             |
| Rheumatoid Arthritis       | 30.3       | 46.1         | 9.4                     | 14.2             |
| Inflammatory bowel disease | 31.6       | 43.6         | 9.8                     | 15.0             |
| Cancer                     | 43.4       | 42.2         | 6.5                     | 7.9              |
| Long standing illness      | 35.0       | 44.4         | 8.6                     | 12.0             |
| Depression                 | 20.9       | 46.8         | 11.8                    | 20.5             |
| Chronic fatigue Syndrome   | 11.3       | 36.7         | 11.6                    | 40.5             |
